# Supplementary material for: Toward a Sustainable Mental Health Care Model in Qatar: Balancing Challenges and Feasibility Through Public and Provider Perspectives
Source: Research Square preprint supplement (doi:10.21203/rs.3.rs-7039874/v1), 2025-08-19
Supplement: Supplementary file 1 [file 2380f78ea75bced46a5e2bec.docx]

Table (1) : Sociodemographic Characteristics of Study Participants:

| **Variable** | **General Population (n=34)** | **Professional Providers (n-=28)** |
| --- | --- | --- |
| **Gender** | Female: 20 (58.8%)  Male: 14 (41.2%) | Female: 15 (53.6%)  Male: 13 (46.4%) |
| **Age Range (years)** | 20-63  20-29 42.4%  30-39: 33.3%  40+: 24.2% | 25-56 |
| **Years in Profession** | Ranges from university students to senior professionals in their careers. | Early career: 2-10 years (n=12)  Mid-career: 11-20 years (n=10)  Senior: 21-30 years (n=6) |
| **Nationality** | Algeria, Egypt, Iraq, Jordan, Lebanon, Mauritania, Morocco, Palestine, Qatar, Sudan, Syria, Tunisia, Yemen   - Qatari: 12 (35.3%) - Non-Qatari: 22 (64.7%) | Algeria, Bahrain, Britain, Croatia, Ireland, India, Lebanon, Pakistan, Palestine, Qatar, Sudan, Syria, US   - Qatari: 9 (32.1%) - Non-Qatari: 19 (67.9%) |
| **Ethnicity** | Predominantly Arab, with some participants identifying as mixed ethnicity | Arab, Caucasian, mixed-ethnic groups, Slavic, South Asian |
| **Marital Status** | Single: 22 (64.7%)  Married: 9 (26.5%)  Divorced: 3 (8.8%) | Single: 6 (21.4%)  Married: 21 (75%)  Divorced: 1 (3.6%) |
| **Educational Attainment** | Varied (students to professionals), most with at least a bachelor’s degree | Primarily postgraduate degrees |
| **Profession** | Education (Teachers, Professors)  Healthcare (Medical Doctors, Administrators)  Business &Technology (CEOs, Software Engineers)  Media & Communication (Journalists, Consultants, Social Media Specialists)  Public Sector (Ministry Staff, Policy Advisors) | Psychiatry: 8 (28.6%)  Psychology: 11 (39.3%)  Social Work: 6 (21.4%)  Other Health Roles: 3 (10.7%) |
| **Years of Experience** | Varied:  1-20 years for professionals  Students: 2nd-3rd years | Range: 2-30 years  Mean: 11.86 years  Distribution:  - 2-10 years: 12 participants  - 11-20 years: 10 participants  - 21-30 years: 6 participants |
| **Workplace** | Varied, including universities, ministries, media organizations, research institutes, and NGOs across Qatar | Clinical settings (e.g., Sidra, HMC, private clinics), academic institutions, and public-sector organizations |
